# Supplementary material for: On the effect of low concentrations of alcohols on the conformational stability of globular proteins
Source: Royal Society of Chemistry journal article supplement (doi:10.1039/c2cp23463g), 2012-01-01
Supplement: c2cp23463g.pdf [file c2cp23463g.pdf]

## Supporting Information

**Table S1.** Experimental molar volume of water (from reference 18 of the text),  $V_w$ , effective hard sphere diameter of water molecules,  $\sigma_w$ , determined by fitting the experimental  $\beta_T$  values with respect to the theoretical SPT formula, the corresponding values of volume packing density  $\xi_w$ , values of  $\Delta G_C$  to create in water a spherical cavity of radius  $a = 10 \text{ \AA}$ , corresponding to the N-state, and a spherocylindrical cavity of radius  $a = 4 \text{ \AA}$  and cylindrical length  $l = 78 \text{ \AA}$ , corresponding to the D-state; values of  $\Delta\Delta G_C = \Delta G_C(D) - \Delta G_C(N)$ , of  $T \cdot \Delta S_{\text{conf}}$ , calculated according to eqn. (6), and of  $\Delta G_D = \Delta\Delta G_C - T \cdot \Delta S_{\text{conf}}$ . These same values were used to construct Figures 2 and 3 in reference 7 of the text.

| T   | $V_w$                          | $\sigma_w$   | $\xi_w$ | $\Delta G_C(N)$      | $\Delta G_C(D)$      | $\Delta\Delta G_C$   | $T \cdot \Delta S_{\text{conf}}$ | $\Delta G_D$         |
|-----|--------------------------------|--------------|---------|----------------------|----------------------|----------------------|----------------------------------|----------------------|
| °C  | $\text{cm}^3 \text{ mol}^{-1}$ | $\text{\AA}$ |         | $\text{kJ mol}^{-1}$ | $\text{kJ mol}^{-1}$ | $\text{kJ mol}^{-1}$ | $\text{kJ mol}^{-1}$             | $\text{kJ mol}^{-1}$ |
| -30 | 18.316                         | 2.6104       | 0.30622 | 282.4                | 498.1                | 215.7                | 238.6                            | -22.9                |
| -20 | 18.137                         | 2.6616       | 0.32780 | 325.0                | 573.0                | 248.0                | 248.4                            | -0.4                 |
| -10 | 18.054                         | 2.6885       | 0.33939 | 356.4                | 628.2                | 271.8                | 258.3                            | 13.5                 |
| -5  | 18.033                         | 2.6972       | 0.34309 | 369.4                | 651.0                | 281.6                | 263.2                            | 18.4                 |
| 0   | 18.023                         | 2.7034       | 0.34566 | 380.6                | 670.8                | 290.1                | 268.1                            | 22.0                 |
| 5   | 18.021                         | 2.7085       | 0.34766 | 391.1                | 689.1                | 298.0                | 273.0                            | 25.0                 |
| 10  | 18.025                         | 2.7117       | 0.34880 | 400.0                | 704.9                | 304.9                | 277.9                            | 27.0                 |
| 20  | 18.052                         | 2.7153       | 0.34967 | 415.3                | 731.8                | 315.5                | 287.7                            | 27.8                 |
| 30  | 18.099                         | 2.7158       | 0.34897 | 427.5                | 753.3                | 325.8                | 297.5                            | 28.3                 |
| 40  | 18.161                         | 2.7137       | 0.34696 | 436.7                | 769.6                | 332.9                | 307.3                            | 25.6                 |

|     |        |        |         |       |       |       |       |       |
|-----|--------|--------|---------|-------|-------|-------|-------|-------|
| 50  | 18.238 | 2.7095 | 0.34389 | 443.5 | 781.6 | 338.1 | 317.1 | 21.0  |
| 60  | 18.328 | 2.7037 | 0.34002 | 448.1 | 789.9 | 341.8 | 327.0 | 14.8  |
| 70  | 18.430 | 2.6964 | 0.33541 | 450.7 | 794.6 | 343.9 | 336.8 | 7.1   |
| 80  | 18.543 | 2.6880 | 0.33025 | 451.8 | 796.6 | 344.8 | 346.6 | -1.8  |
| 90  | 18.667 | 2.6778 | 0.32433 | 450.8 | 795.0 | 344.2 | 356.4 | -12.2 |
| 100 | 18.803 | 2.6666 | 0.31797 | 448.5 | 791.1 | 342.6 | 366.2 | -23.6 |

---

## Supporting Information

**Table S2.** Aqueous 2M MeOH solution is treated as a slightly modified water: (1) it is considered a uniform liquid with the same density values of neat water for temperatures above TMD, but shifted by 2 °C toward lower temperatures, because TMD = 2.23 °C for aqueous 2M MeOH solution, whereas for neat water TMD = 3.98 °C (see references 17 and 18 of the text); (2) at temperatures below TMD, the density of aqueous 2M MeOH solution is assumed to decrease to a slightly lesser extent than that of neat water, because for common organic liquids, such as alcohols, the density increases on decreasing temperature. Effective values for the hard sphere diameter of solvent molecules,  $\sigma$ , correspond to those of neat water, but they are simply attributed to temperatures lower by 2 °C with respect to the neat water case; the corresponding values of volume packing density  $\xi$ ; values of  $\Delta G_C$  to create in aqueous 2M MeOH solution a spherical cavity of radius  $a = 10$  Å, corresponding to the N-state, and a spherocylindrical cavity of radius  $a = 4$  Å and cylindrical length  $l = 78$  Å, corresponding to the D-state; values of  $\Delta\Delta G_C = \Delta G_C(D) - \Delta G_C(N)$ , of  $\Delta\Delta G_C + \Delta E_a$ , where  $\Delta E_a = 5$  kJ mol<sup>-1</sup> independent of temperature, of  $T \cdot \Delta S_{\text{conf}}$ , calculated according to eqn. (6), and of  $\Delta G_d = \Delta\Delta G_C + \Delta E_a - T \cdot \Delta S_{\text{conf}}$ .

| T   | $\sigma$ | $\xi$   | $\Delta G_C(N)$      | $\Delta G_C(D)$      | $\Delta\Delta G_C$   | $\Delta\Delta G_C + \Delta E_a$ | $T \cdot \Delta S_{\text{conf}}$ | $\Delta G_d$         |
|-----|----------|---------|----------------------|----------------------|----------------------|---------------------------------|----------------------------------|----------------------|
| °C  | Å        |         | kJ mol <sup>-1</sup> | kJ mol <sup>-1</sup> | kJ mol <sup>-1</sup> | kJ mol <sup>-1</sup>            | kJ mol <sup>-1</sup>             | kJ mol <sup>-1</sup> |
| -32 | 2.6104   | 0.31522 | 296.7                | 523.2                | 226.5                | 231.5                           | 236.7                            | -5.2                 |
| -22 | 2.6616   | 0.33080 | 328.6                | 579.2                | 250.6                | 255.6                           | 246.5                            | 9.1                  |
| -12 | 2.6885   | 0.34039 | 355.9                | 627.3                | 271.4                | 276.4                           | 256.3                            | 20.1                 |
| -7  | 2.6972   | 0.34409 | 368.9                | 650.1                | 281.2                | 286.2                           | 261.2                            | 25.0                 |
| -2  | 2.7034   | 0.34666 | 380.2                | 670.0                | 289.8                | 294.8                           | 266.1                            | 28.7                 |

|    |        |         |       |       |       |       |       |       |
|----|--------|---------|-------|-------|-------|-------|-------|-------|
| 3  | 2.7085 | 0.34766 | 388.2 | 684.1 | 295.9 | 300.9 | 271.0 | 29.9  |
| 8  | 2.7117 | 0.34880 | 397.2 | 699.9 | 302.7 | 307.7 | 275.9 | 31.8  |
| 18 | 2.7153 | 0.34967 | 412.5 | 726.8 | 314.3 | 319.3 | 285.7 | 33.6  |
| 28 | 2.7158 | 0.34897 | 424.6 | 748.3 | 323.7 | 328.7 | 295.5 | 33.2  |
| 38 | 2.7137 | 0.34696 | 433.9 | 764.7 | 330.8 | 335.8 | 305.4 | 30.4  |
| 48 | 2.7095 | 0.34389 | 440.7 | 776.7 | 336.0 | 341.0 | 315.2 | 25.8  |
| 58 | 2.7037 | 0.34002 | 445.4 | 785.1 | 339.7 | 344.7 | 325.0 | 19.7  |
| 68 | 2.6964 | 0.33541 | 448.1 | 790.0 | 341.9 | 346.9 | 334.8 | 12.1  |
| 78 | 2.6880 | 0.33025 | 449.2 | 792.1 | 342.9 | 347.9 | 344.6 | 3.3   |
| 88 | 2.6778 | 0.32433 | 448.3 | 790.6 | 342.3 | 347.3 | 354.4 | -7.1  |
| 98 | 2.6666 | 0.31797 | 446.1 | 786.8 | 340.7 | 345.7 | 364.2 | -18.5 |

---
